# Supplementary material for: Global trends in research of nasopharyngeal carcinoma: a bibliometric and visualization analysis
Source: PubMed Central journal article supplement (PMC11249725; doi:10.3389/fonc.2024.1392245), 2024-07-02
Supplement: DataSheet_1.pdf [file DataSheet_1.pdf]

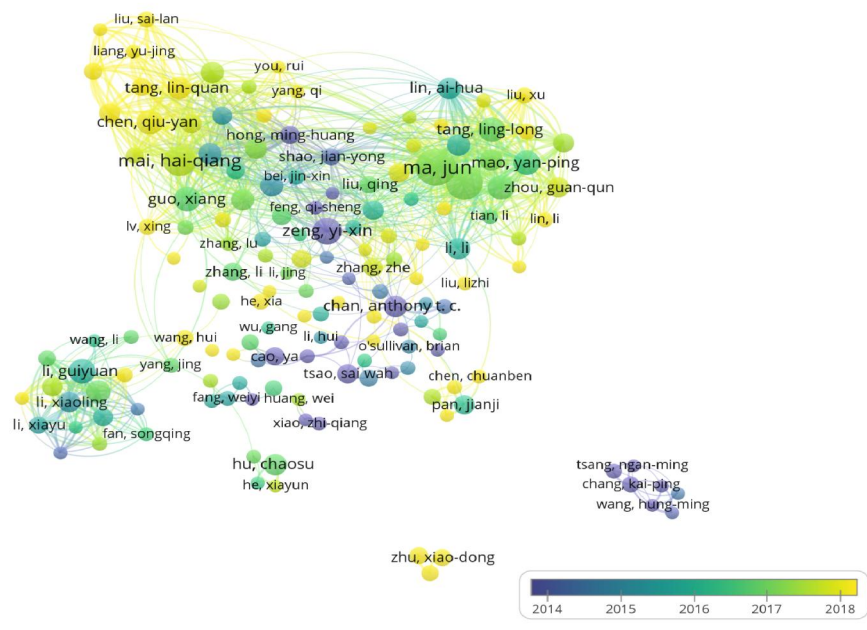

Supplementary Figure 1. The coauthorship overlay map of authors.
